# Supplementary material for: The Interplay between Socioeconomic Status, Parenting and Temperament Predicts Inhibitory Control at Two Years of Age
Source: MDPI journal article supplement (doi:10.3390/children10061085), 2023-06-20
Supplement: s1 [file s1]

**Supplementary Table 1**

Coefficients for the moderation analysis testing the interplay between SES, coercive/inconsistent parenting and IC in the Snack Delay task. Significance levels: #  $p < 0.1$ , \* $p < 0.05$ , \*\* $p < 0.01$ . 95% CI are provided between squared brackets.

| DV :Snack Delay performance      | $R^2$             | $B$   | $t$                | 95%CI           | $\Delta R^2$ |
|----------------------------------|-------------------|-------|--------------------|-----------------|--------------|
|                                  | 0.06 <sup>#</sup> |       |                    |                 |              |
| SES                              |                   | 0.37  | 1.67 <sup>#</sup>  | [-0.08,0.81]    |              |
|                                  | 0.16*             |       |                    |                 | 0.10*        |
| SES                              |                   | 0.43  | 2.03*              | [0.00,0.86]     |              |
| Inconsistent /Coercive Parenting |                   | -1.12 | -2.27*             | [-2.11,-0.13]   |              |
|                                  | 0.20*             |       |                    |                 | 0.03         |
| SES                              |                   | 0.48  | 2.24*              | [0.05,0.91]     |              |
| Inconsistent /Coercive Parenting |                   | -1.22 | -2.48*             | [-2.22,-0.23]   |              |
| EC                               |                   | -0.20 | -1.36              | [-0.51,0.11]    |              |
|                                  | 0.29**            |       |                    |                 | 0.09*        |
| SES                              |                   | -0.70 | -1.32              | [-1.77,0.37]    |              |
| Inconsistent /Coercive Parenting |                   | -1.74 | -3.38**            | [-2.77,-0.70]   |              |
| EC                               |                   | -0.28 | -1.9 <sup>#</sup>  | [-0.57,0.02]    |              |
| SES x Parenting                  |                   | 2.24  | 2.40*              | [0.36,4.13]     |              |
|                                  | 0.35**            |       |                    |                 | 0.06*        |
| SES                              |                   | 2.27  | 1.37               | [-1.09,5.63]    |              |
| Inconsistent /Coercive Parenting |                   | -1.41 | -2.66**            | [-2.48,-0.34]   |              |
| EC                               |                   | 0.03  | 0.16               | [-0.41,0.47]    |              |
| SES x Parenting                  |                   | 1.81  | 1.93 <sup>#</sup>  | [-0.08,3.7]     |              |
| SES x EC                         |                   | -0.58 | -1.88 <sup>#</sup> | [-1.19,0.05]    |              |
|                                  | 0.35**            |       |                    |                 | 0.00         |
| SES                              |                   | 2.05  | 1.02               | [-2.03,6.13]    |              |
| Inconsistent /Coercive Parenting |                   | -0.38 | -0.07              | [-10.81, 10.06] |              |
| EC                               |                   | 0.18  | 0.24               | [-1.35,1.7]     |              |
| SES x Parenting                  |                   | 1.87  | 1.88 <sup>#</sup>  | [-0.15,3.89]    |              |
| SES x EC                         |                   | -0.54 | -1.45              | [-1.28,0.21]    |              |
| Parenting x EC                   |                   | -0.22 | -0.20              | [-2.41,1.98]    |              |
|                                  | 0.43**            |       |                    |                 | 0.08*        |
| SES                              |                   | -8.32 | -1.69              | [-18.31,1.67]   |              |
| Inconsistent /Coercive Parenting |                   | -4.32 | -0.83              | [-14.84,6.2]    |              |
| EC                               |                   | 0.09  | 0.12               | [-1.37,1.54]    |              |
| SES x Parenting                  |                   | 21.00 | 2.49*              | [3.92,38.08]    |              |
| SESXEC                           |                   | 1.64  | 1.61               | [-0.42,3.69]    |              |
| Parenting x EC                   |                   | 0.73  | 0.66               | [-1.52,2.98]    |              |
| SES x Parenting x EC             |                   | -4.06 | -2.28*             | [-7.66,-46]     |              |
